# Supplementary material
Source: PubMed Central journal article supplement (PMC11195405)
Supplement: NIHPP2023.09.08.556679V3-supplement-1.pdf [file NIHPP2023.09.08.556679V3-supplement-1.pdf]

## Supplementary Materials

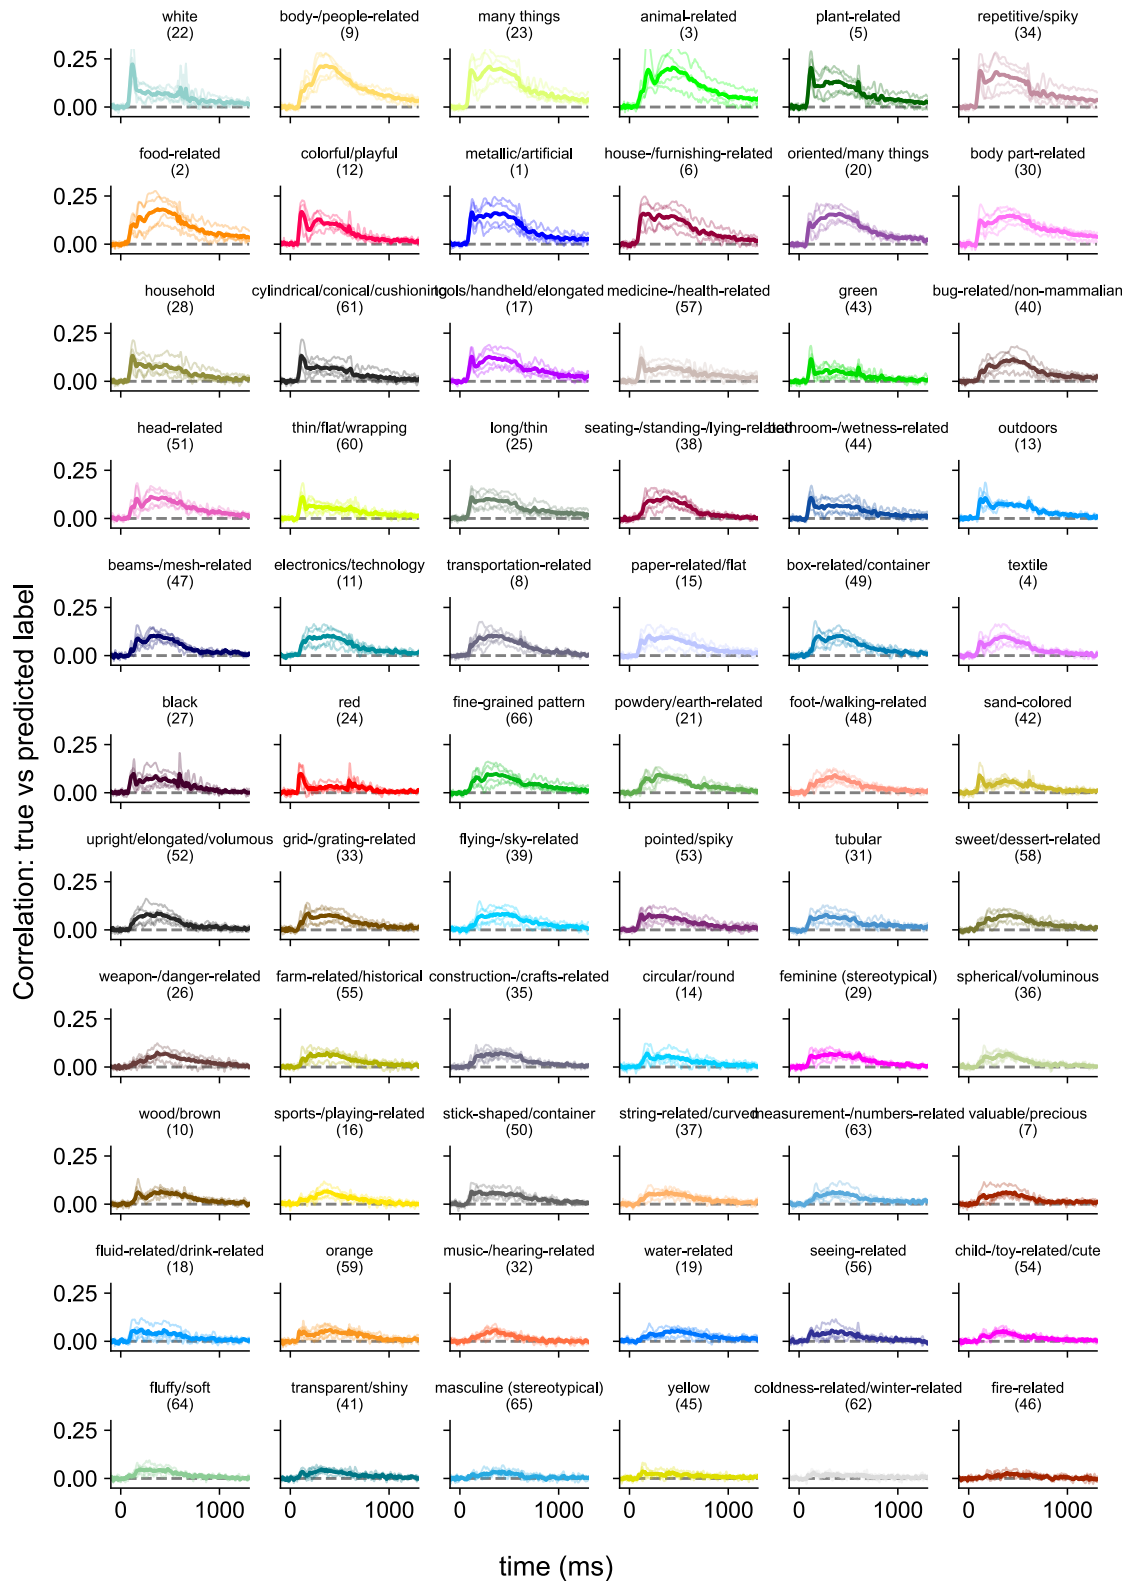

**Figure S1. Dimension timecourses for within-participant regression model.** Each panel shows the correlation between the predicted and true weights for each dimension over time. The timecourses are sorted by peak amplitude. The thin lines show the correlations for each participant. The thick lines show the average across participants.

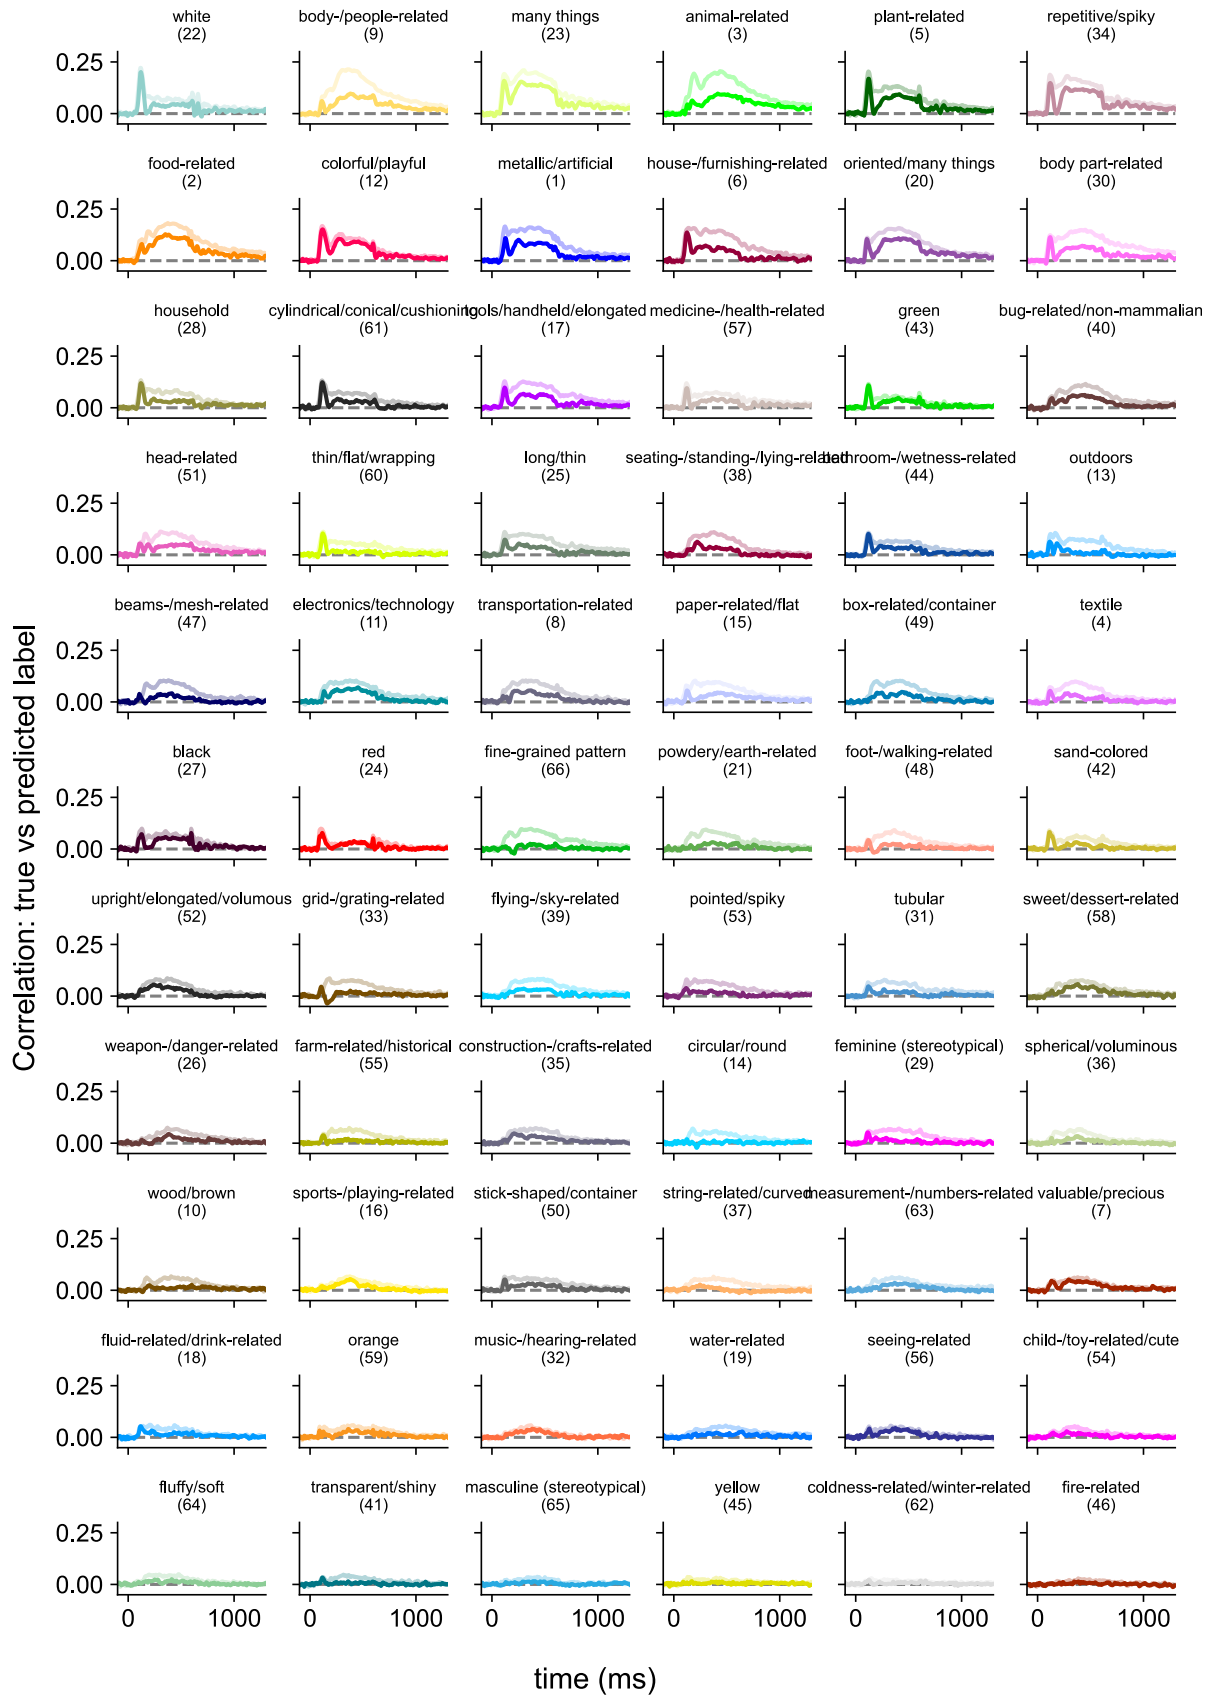

**Figure S2. Dimension timecourses for across-participant regression model.** Each panel shows the correlation between the predicted and true weights for one of the 66 dimensions over time. Saturated lines show the correlation timecourses for the across-participant models where the model is trained on data from three participants and tested on the data from a left-out participant. The transparent lines show the average correlation timecourses for the within-participant model as a reference. The timecourses are sorted by peak amplitude.
